# Supplementary material
Source: publisher site journal article supplement (https://www.dovepress.com/article/552739)
Supplement: Supplementary file 1 [file 552739_Supplementary%20material%201.docx]

# Supplementary material 1

Detailed description of the diagnostic process in patients suspected of having idiopathic intracranial hypertension.

## Diagnosis

IIH was diagnosed according to the 2013 Friedman criteria1 as specified below. All patients had normal cerebrospinal fluid contents and normal neuroimaging (cerebral MRI and CT/MRI venography) except from signs indicating intracranial hypertension. Space-occupying lesions, hydrocephalus and venous sinus thrombosis were ruled out. Other secondary causes of intracranial hypertension were rigorously excluded.

Patients are pooled into one common category termed *IIH* regardless of which subtype of IIH they were diagnosed with including the below four sub-categories:

1. **Definite IIH**: Papilledema, lumbar opening pressure (LP OP) ≥25 cm CSF.
2. **Probable IIH**: Papilledema and LP OP<25 cm CSF. Patients diagnosed with probable IIH had extensive diagnostic work-up to disprove any alternative etiology of optic disc edema. They had a classic phenotypical presentation of IIH (young age, female sex, BMI indicating obesity, typical symptoms, and neuroimaging with signs of intracranial hypertension). Patients in this group all had LP OP >20 cm CSF; in two patients, the LP OP was questionable due to technical difficulties and/or already initiation of ICP lowering treatment. Patients had moderate grades of papilledema, and all had some neuroimaging signs of intracranial hypertension. Hence, the most likely diagnosis according to tertiary specialists was probable IIH.
3. **Definite IIHWOP:** No papilledema, but LP OP≥25 cm CSF and abducens palsy: No patients in this cohort were diagnosed with definite IIHWOP.
4. **Suggested IIHWOP**: No papilledema, but LP OP≥25 cm CSF and at least 3/4 specified neuroimaging signs: i) flattening of the posterior aspect of the globe, ii) distended optic nerve sheaths, iii) partial empty sella, and iv) transverse venous sinus stenosis.

**Controls (nonIIH)** may have had an elevated LP OP measured but were not diagnosed with IIH if they had neither papilledema, abducens palsy or at least 3 neuroimaging signs of intracranial hypertensions as specified above. Also, there was no evident secondary cause for intracranial hypertension in the patients. Since they had as high BMI as in IIH, BMI which correlated with higher LP OP, this is no surprise and is previously reported in the literature, i.e., in migraine.

## Ophthalmological assessment

All patients had their fundus evaluated by an ophthalmologist. All patients diagnosed with IIH, and some patients diagnosed with non-IIH were also evaluated by an expert neuro-ophthalmologist. Hence, pseudo-papilledema was rigorously judged by experts in all cases of presumed optic disc swelling. This is evident from the high proportion of nonIIH with a final diagnosis of pseudo-papilledema (Fig 1). Patients suspected of having IIH are evaluated by ophthalmologists urgently in close temporal proximity to the diagnostic work-up and diagnosis. In case of the appearance of optic diss swelling, they are subsequently referred to neuro-ophthalmologists. The time interval from initial diagnostic work-up to neuro-ophthalmology assessment depends on the severity of the swelling and can be days to months. However, the grading of papilledema in this study is based on the imaging obtained at time of diagnostic work-up, hence not delayed.

Reference

1. Friedman DI, Liu GT, Digre KB. Revised diagnostic criteria for the pseudotumor cerebri syndrome in adults and children. *Neurology*. 2013;81(13):1159-1165. doi:10.1212/WNL.0b013e3182a55f17
